# Supplementary material
Source: PubMed Central journal article supplement (PMC11389822)
Supplement: NIHMS2011695-supplement-Supplementary_Data.pdf [file NIHMS2011695-supplement-Supplementary_Data.pdf]

SUPPLEMENTARY APPENDIX

Supplementary Table 1. Norovirus season characteristics by region, 2012–2019

|                         | Mid-Atlantic | Midcentral | Midwest     | Northeast   | Northwest  | Southcentral | Southeast  | West         | Min          | Max         |
|-------------------------|--------------|------------|-------------|-------------|------------|--------------|------------|--------------|--------------|-------------|
| Number of outbreaks     | 3041         | 2880       | 3904        | 3032        | 1661       | 1727         | 2526       | 1558         | 1558         | 3904        |
| Onset week              | November 28  | November 7 | November 21 | November 28 | October 24 | October 17   | November 7 | September 26 | September 26 | November 28 |
| Peak week               | January 2    | January 2  | February 27 | January 16  | January 2  | January 2    | January 30 | December 26  | December 26  | February 27 |
| Offset week             | April 10     | April 24   | April 24    | April 17    | May 29     | May 8        | May 8      | June 5       | April 10     | June 5      |
| Season duration (weeks) | 20           | 25         | 23          | 21          | 32         | 30           | 27         | 37           | 20           | 37          |
| Peak to mean ratio      | 3.0          | 2.8        | 2.6         | 3.0         | 2.1        | 2.2          | 2.7        | 1.9          | 1.9          | 3.0         |

Supplementary Table 2. Norovirus season characteristics by region, limited to outbreaks reported to NORS, 2009–2019

|                         | Mid-Atlantic | Midcentral  | Midwest     | Northeast  | Northwest   | Southcentral | Southeast  | West         | Min          | Max        |
|-------------------------|--------------|-------------|-------------|------------|-------------|--------------|------------|--------------|--------------|------------|
| Number of outbreaks     | 3214         | 2061        | 2746        | 3498       | 1024        | 1379         | 1704       | 1081         | 1024         | 3498       |
| Onset week              | November 28  | November 14 | November 21 | December 5 | October 17  | October 17   | October 31 | September 19 | September 19 | December 5 |
| Peak week               | February 6   | January 2   | January 2   | January 16 | December 26 | January 16   | February 6 | December 26  | December 26  | February 6 |
| Offset week             | April 10     | April 17    | April 24    | April 10   | May 22      | May 8        | May 1      | May 22       | April 10     | May 22     |
| Season duration (weeks) | 20           | 23          | 23          | 19         | 32          | 30           | 27         | 36           | 19           | 36         |
| Peak to mean ratio      | 3.0          | 3.0         | 2.6         | 3.0        | 2.5         | 2.3          | 2.9        | 2.0          | 2.0          | 3.0        |

Supplementary Table 3. Norovirus season characteristics by region, limited to outbreaks spread by person-to-person transmission, 2009–2019

|                         | Mid-Atlantic | Midcentral  | Midwest     | Northeast  | Northwest   | Southcentral | Southeast   | West         | Min          | Max        |
|-------------------------|--------------|-------------|-------------|------------|-------------|--------------|-------------|--------------|--------------|------------|
| Number of outbreaks     | 3437         | 2815        | 3434        | 3662       | 1151        | 1423         | 2208        | 901          | 901          | 3662       |
| Onset week              | November 28  | November 21 | November 28 | December 5 | October 31  | October 24   | November 14 | September 19 | September 19 | December 5 |
| Peak week               | January 2    | January 2   | February 27 | January 16 | December 26 | January 16   | February 6  | April 24     | December 26  | April 24   |
| Offset week             | April 3      | April 17    | April 17    | April 10   | May 22      | May 8        | April 24    | May 15       | April 3      | May 22     |
| Season duration (weeks) | 19           | 22          | 21          | 19         | 30          | 29           | 24          | 35           | 19           | 35         |
| Peak to mean ratio      | 3.3          | 3.1         | 2.7         | 3.1        | 2.6         | 2.3          | 3.0         | 2.0          | 2.0          | 3.3        |

Supplementary Table 4. Norovirus season characteristics by region, limited to foodborne outbreaks, 2009–2019

|                         | Mid-Atlantic | Midcentral   | Midwest      | Northeast   | Northwest    | Southcentral | Southeast | West         | Min          | Max        |
|-------------------------|--------------|--------------|--------------|-------------|--------------|--------------|-----------|--------------|--------------|------------|
| Number of outbreaks     | 261          | 579          | 683          | 361         | 334          | 286          | 421       | 523          | 261          | 683        |
| Onset week              | October 10   | September 26 | September 26 | October 3   | September 12 | October 17   | October 3 | September 26 | September 12 | October 17 |
| Peak week               | December 5   | December 12  | May 8        | December 12 | January 16   | February 20  | April 3   | November 28  | November 28  | May 8      |
| Offset week             | April 10     | April 3      | April 10     | April 3     | April 17     | June 12      | April 3   | April 24     | April 3      | June 12    |
| Season duration (weeks) | 27           | 28           | 29           | 27          | 32           | 35           | 27        | 31           | 27           | 35         |
| Peak to mean ratio      | 4.0          | 3.1          | 2.2          | 2.9         | 1.9          | 2.7          | 2.5       | 2.4          | 1.9          | 4.0        |

Supplementary Table 5. Norovirus season characteristics by region, limited to confirmed norovirus outbreaks, 2009–2019

|                         | Mid-Atlantic | Midcentral | Midwest     | Northeast   | Northwest  | Southcentral | Southeast   | West        | Min         | Max         |
|-------------------------|--------------|------------|-------------|-------------|------------|--------------|-------------|-------------|-------------|-------------|
| Number of outbreaks     | 766          | 1613       | 1609        | 721         | 1021       | 630          | 1286        | 763         | 630         | 1613        |
| Onset week              | November 28  | October 31 | November 21 | November 28 | October 24 | October 31   | November 14 | October 24  | October 24  | November 28 |
| Peak week               | January 2    | January 2  | February 27 | February 27 | January 2  | January 2    | January 30  | November 28 | November 28 | February 27 |
| Offset week             | April 10     | May 1      | May 1       | May 1       | May 22     | May 15       | May 8       | June 12     | April 10    | June 12     |
| Season duration (weeks) | 20           | 27         | 24          | 23          | 31         | 29           | 26          | 34          | 20          | 34          |
| Peak to mean ratio      | 3.3          | 2.7        | 2.8         | 3.2         | 2.4        | 2.7          | 3.1         | 2.0         | 2.0         | 3.3         |

Supplementary Table 6. Norovirus season characteristics by region, limited to confirmed norovirus GII.4 outbreaks, 2009–2019

|                         | Mid-Atlantic | Midcentral  | Midwest     | Northeast   | Northwest   | Southcentral | Southeast   | West        | Min         | Max         |
|-------------------------|--------------|-------------|-------------|-------------|-------------|--------------|-------------|-------------|-------------|-------------|
| Number of outbreaks     | 445          | 916         | 955         | 402         | 613         | 347          | 757         | 392         | 347         | 955         |
| Onset week              | December 5   | November 14 | December 19 | December 5  | November 28 | November 14  | November 28 | November 14 | November 14 | December 19 |
| Peak week               | March 6      | January 2   | February 27 | February 27 | February 20 | February 20  | January 30  | March 20    | January 2   | March 20    |
| Offset week             | March 27     | April 24    | April 24    | April 10    | May 22      | April 3      | May 1       | May 22      | March 27    | May 22      |
| Season duration (weeks) | 17           | 24          | 19          | 19          | 26          | 21           | 23          | 28          | 17          | 28          |
| Peak to mean ratio      | 3.9          | 2.6         | 3.9         | 3.4         | 2.6         | 3.7          | 3.2         | 2.8         | 2.6         | 3.9         |

Supplementary Table 7. Norovirus season characteristics by region, limited to confirmed norovirus non-GII.4 outbreaks, 2009–2019

|                         | Mid-Atlantic | Midcentral | Midwest    | Northeast  | Northwest    | Southcentral | Southeast  | West        | Min          | Max        |
|-------------------------|--------------|------------|------------|------------|--------------|--------------|------------|-------------|--------------|------------|
| Number of outbreaks     | 302          | 662        | 619        | 299        | 399          | 263          | 504        | 351         | 263          | 662        |
| Onset week              | October 31   | October 10 | October 24 | November 7 | September 19 | October 10   | October 17 | October 17  | September 19 | November 7 |
| Peak week               | January 2    | January 2  | December 5 | January 16 | January 2    | January 2    | January 30 | November 28 | November 28  | January 30 |
| Offset week             | May 1        | May 15     | May 29     | May 22     | June 5       | June 19      | May 29     | June 19     | May 1        | June 19    |
| Season duration (weeks) | 27           | 32         | 32         | 29         | 38           | 37           | 33         | 36          | 27           | 38         |
| Peak to mean ratio      | 3.1          | 2.8        | 3.0        | 3.7        | 2.9          | 2.8          | 2.8        | 2.8         | 2.8          | 3.7        |

Supplementary Table 8. Norovirus season characteristics by Climate Extremes Index region\*, 2009–2019

|                         | Northeast  | Northern Rockies and Plains | Northwest   | Ohio Valley | South       | Southeast   | Southwest  | Upper Midwest | West        | Min         | Max         |
|-------------------------|------------|-----------------------------|-------------|-------------|-------------|-------------|------------|---------------|-------------|-------------|-------------|
| Number of outbreaks     | 5860       | 644                         | 1726        | 4473        | 691         | 4054        | 1179       | 5136          | 1232        | 644         | 5860        |
| Onset week              | December 5 | October 24                  | October 17  | November 14 | October 24  | November 14 | October 10 | November 7    | October 3   | October 3   | December 5  |
| Peak week               | January 2  | December 19                 | December 26 | January 2   | February 20 | January 30  | December 5 | January 2     | November 28 | November 28 | February 20 |
| Offset week             | April 17   | May 8                       | May 29      | April 24    | April 24    | April 24    | May 29     | April 24      | June 5      | April 17    | June 5      |
| Season duration (weeks) | 20         | 29                          | 33          | 24          | 27          | 24          | 34         | 25            | 36          | 20          | 36          |
| Peak to mean ratio      | 3.0        | 2.7                         | 2.2         | 2.4         | 2.9         | 3.0         | 1.9        | 2.7           | 1.9         | 1.9         | 3.0         |

\*Climate Extremes Index regions were defined as follows (by NOAA):

Northeast: Delaware, Maryland, New Jersey, Pennsylvania, Washington DC, Connecticut, Maine, Massachusetts, New Hampshire, New York, Rhode Island, Vermont

Northern Rockies and Plains: Nebraska, North Dakota, South Dakota, Montana, Wyoming

Northwest: Idaho, Oregon, Washington

Ohio Valley: Missouri, Illinois, Indiana, Ohio, Kentucky, Tennessee, West Virginia

South: Kansas, Texas, Oklahoma, Louisiana, Arkansas, Mississippi

Southeast: Alabama, Florida, Georgia, North Carolina, South Carolina, Virginia

Southwest: Utah, Colorado, Arizona, New Mexico

Upper Midwest: Minnesota, Iowa, Wisconsin, Michigan

West: California, Nevada
